# Supplementary material for: Polycyano–polycadmate host clathrates including a methylviologen dication. Syntheses, crystal structures and photo-induced reduction of methylviologen dication
Source: Royal Society of Chemistry journal article supplement (doi:10.1039/b111059d), 2002-01-01
Supplement: b111059d1.doc [file b111059d1.doc]

Supplementary Material (ESI) for Dalton Transactions

This journal is © The Royal Society of Chemistry 2002


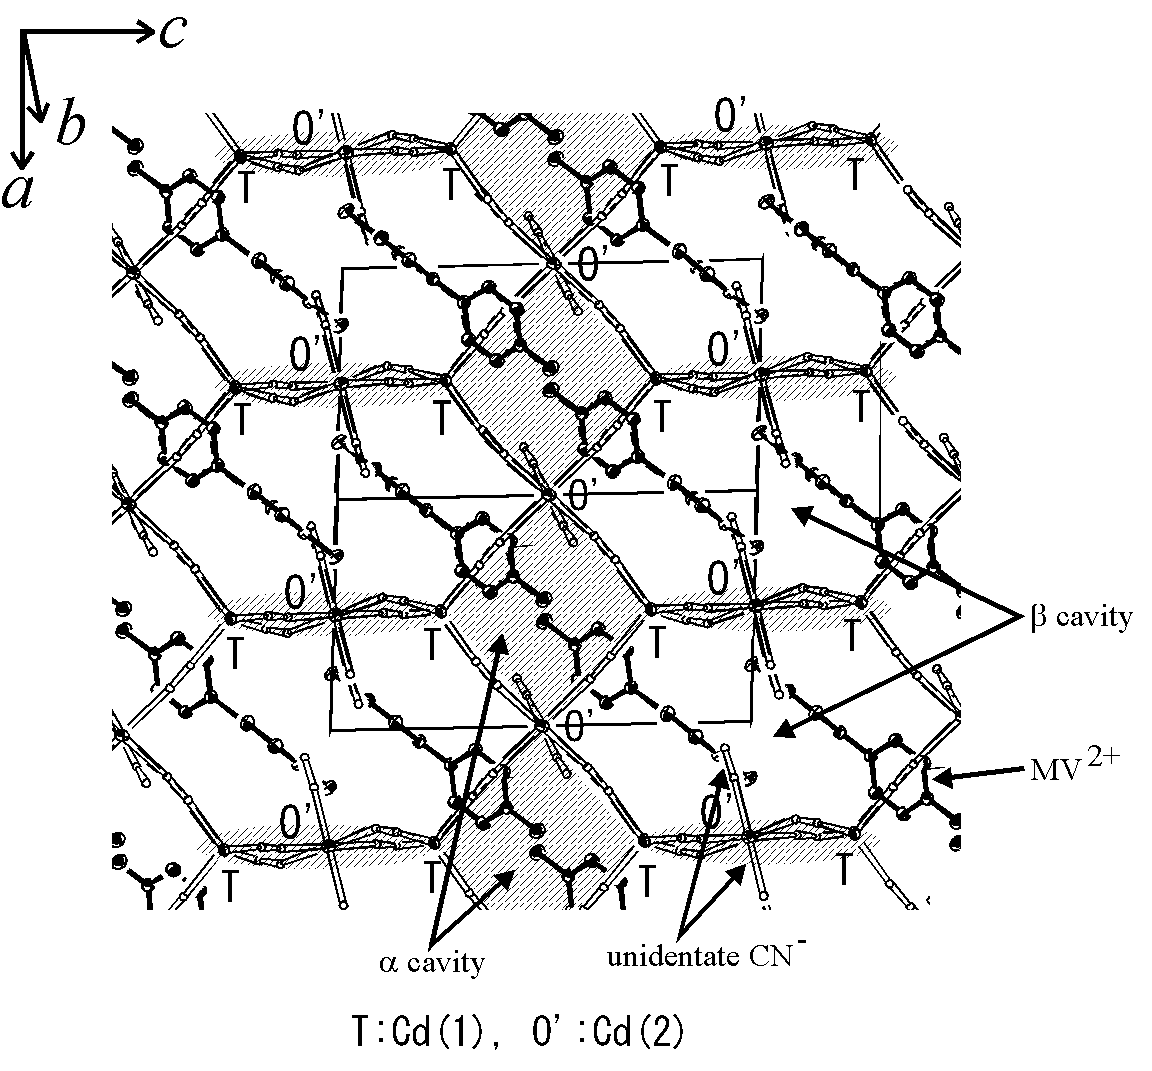

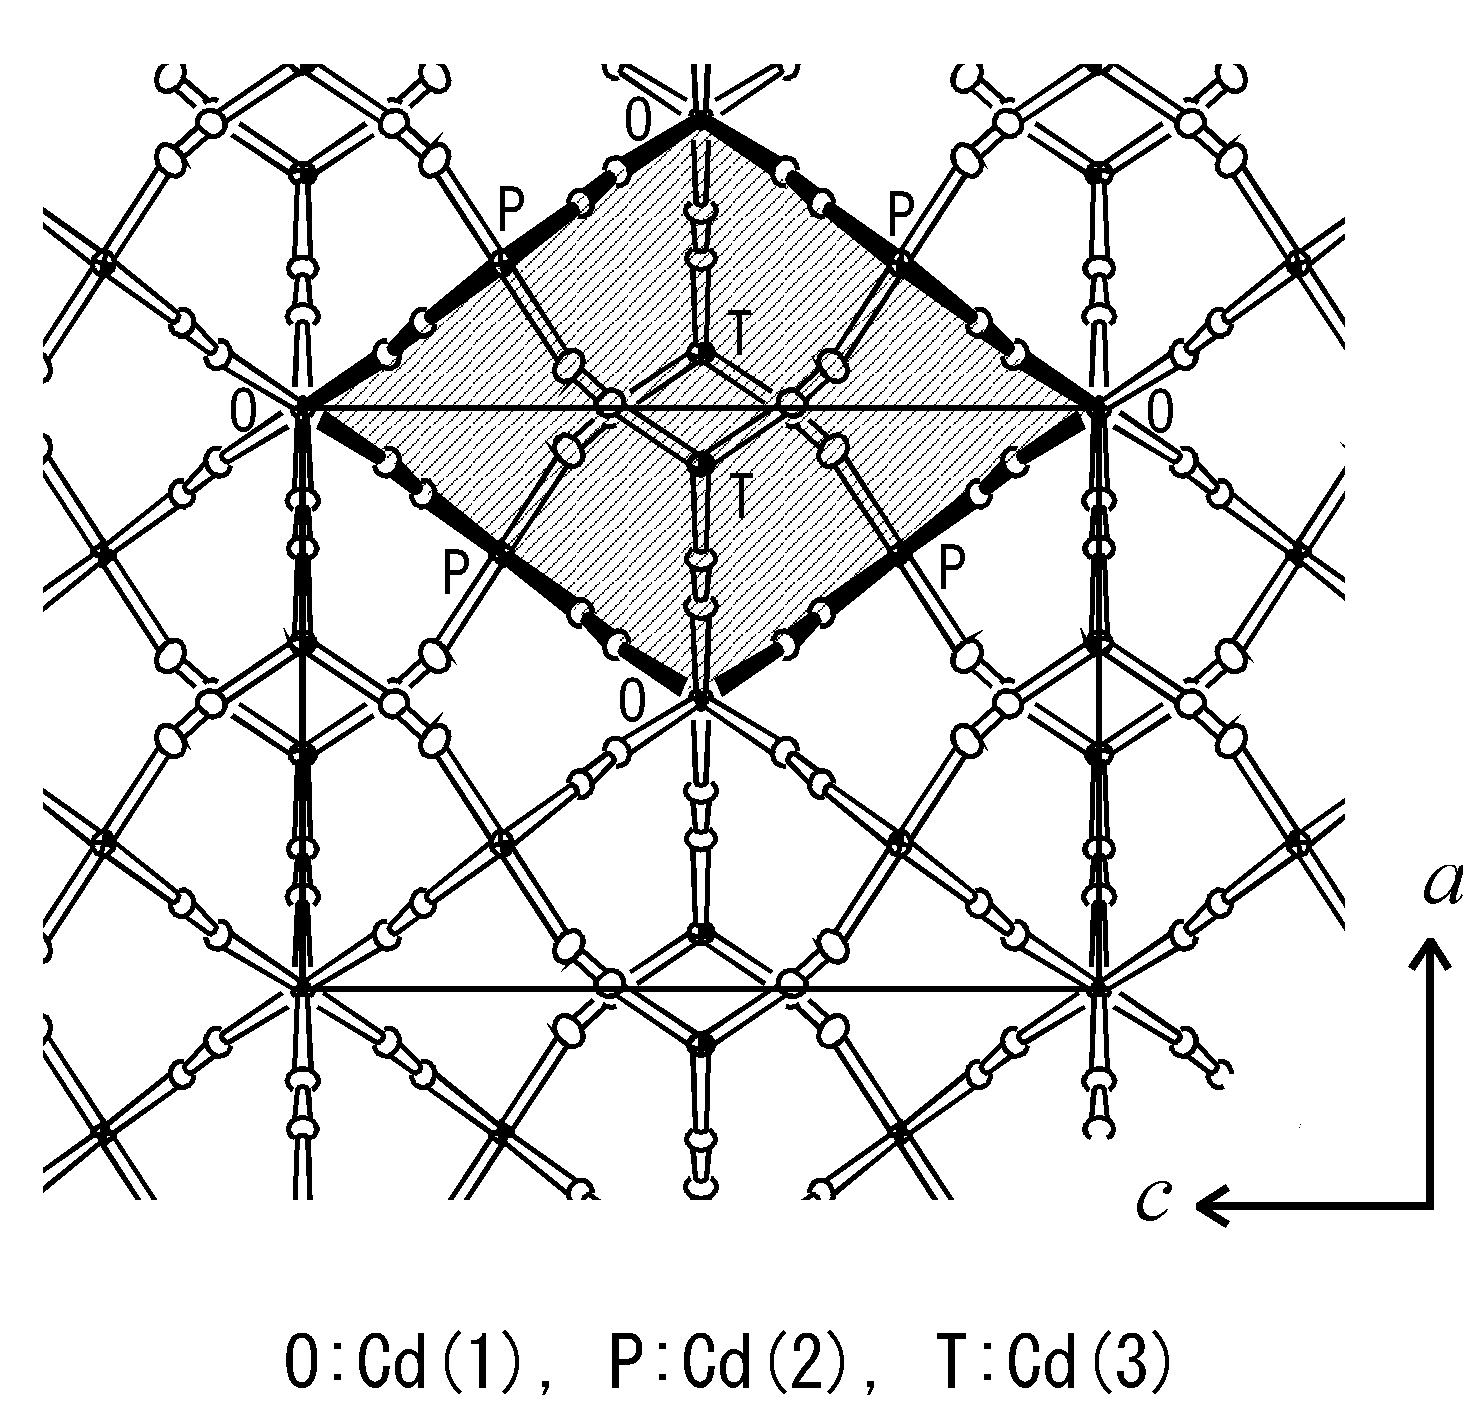


Crystal structure of the toluene clathrate **III-2**.

Crystal structure in the range of *b* = +0.35 to *b* = +0.65. The thick bonds indicate a cage-like cavity. The arrangement of the cage-like cavities is shown.

Crystal structure of the Cd complex **V-1**.

A projective view along the [,1,0] direction shows the 3-D network structure of **V-1** constructed by the linkage of (-O’-T-O’-T-) quadrangles(hatched areas).
