# Supplementary material for: Polycyano–polycadmate host clathrates including a methylviologen dication. Syntheses, crystal structures and photo-induced reduction of methylviologen dication
Source: Royal Society of Chemistry journal article supplement (doi:10.1039/b111059d), 2002-01-01
Supplement: b111059d2.doc [file b111059d2.doc]

Supplementary Material (ESI) for Dalton Transactions

This journal is © The Royal Society of Chemistry 2002


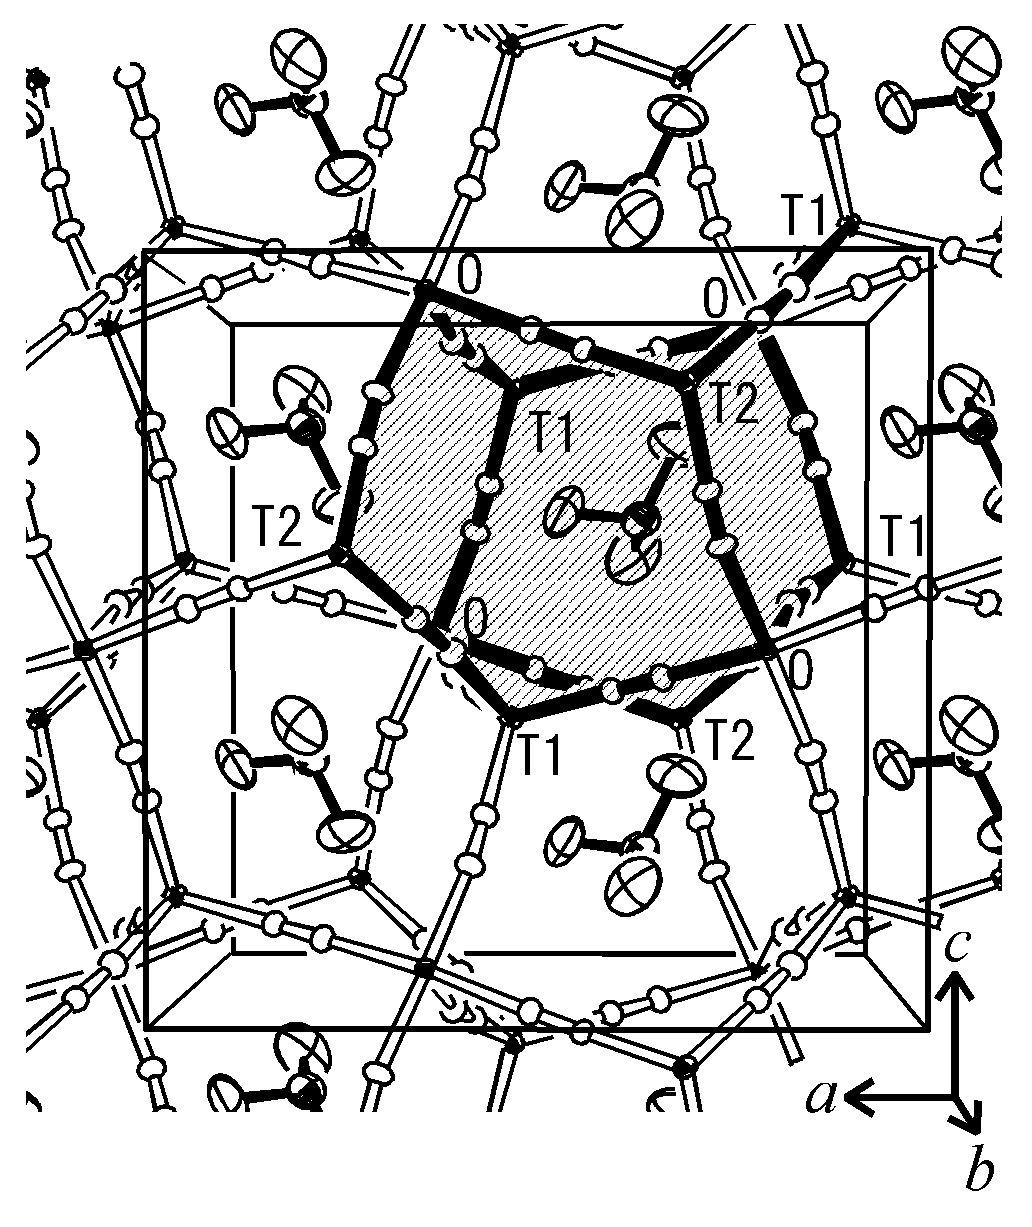

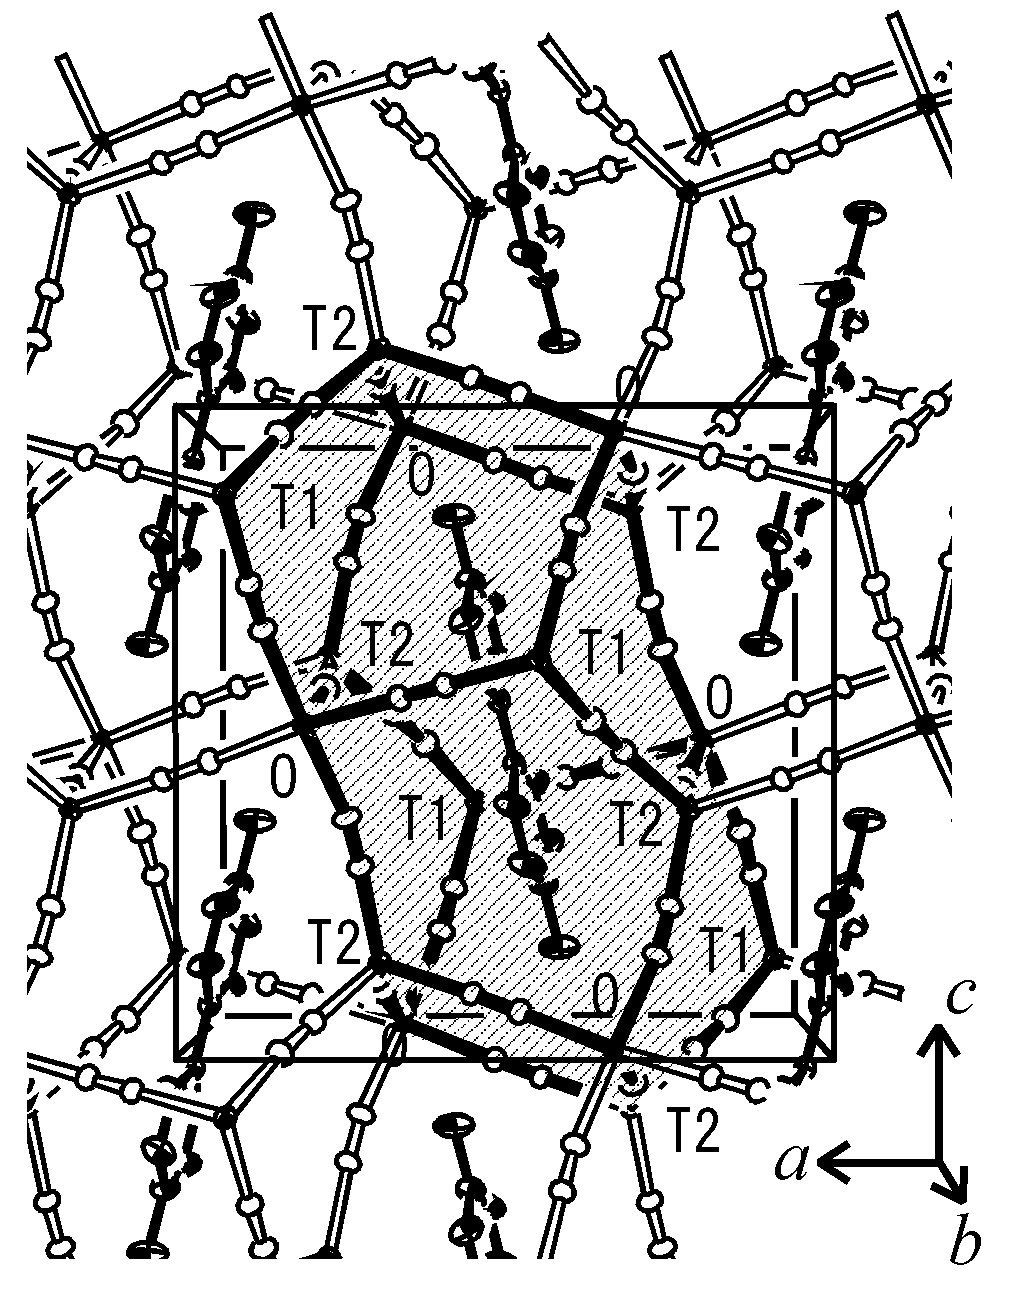

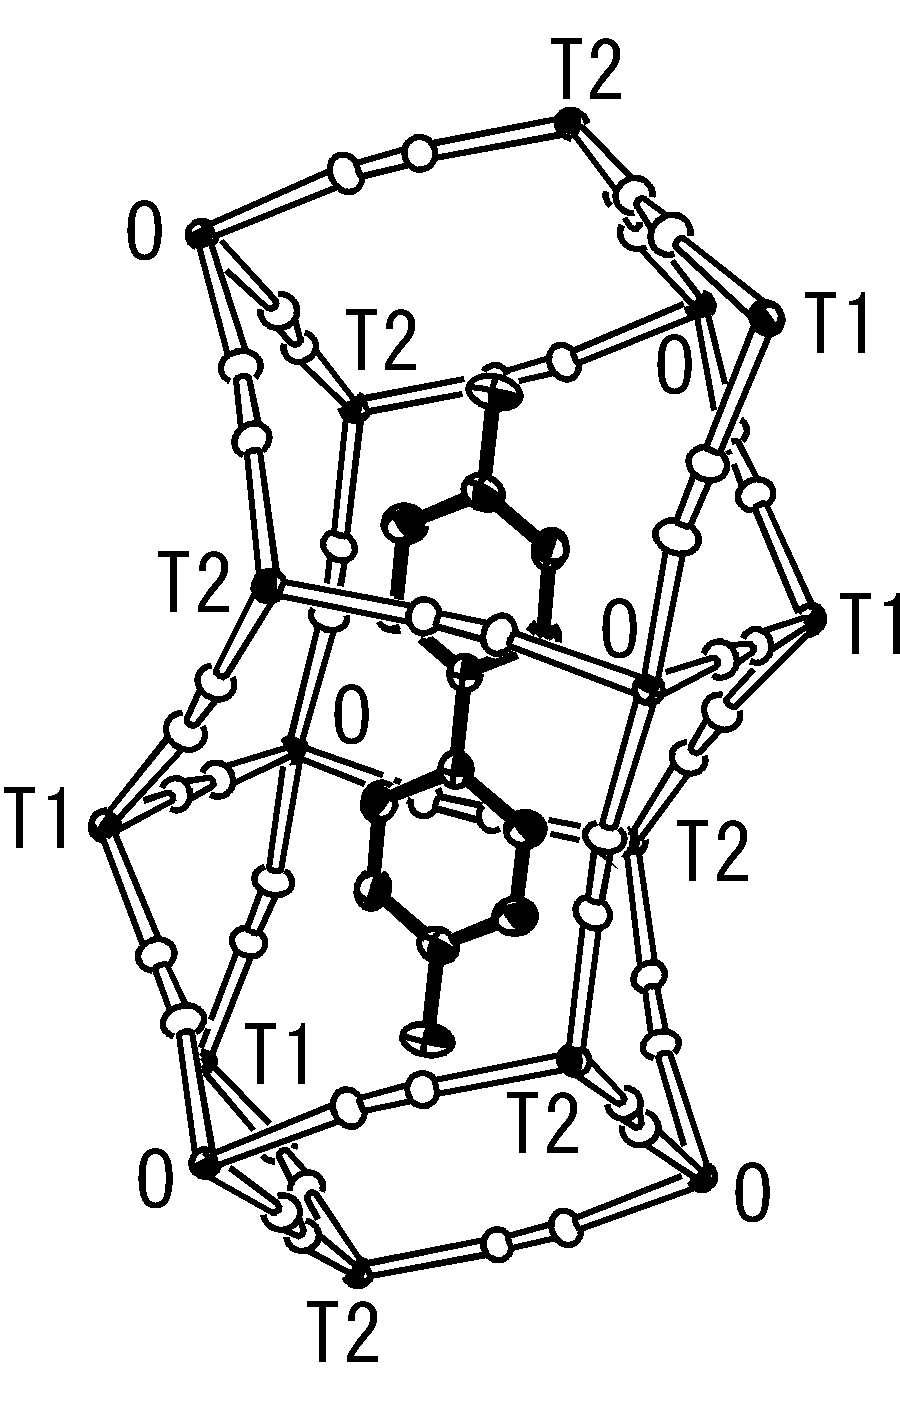

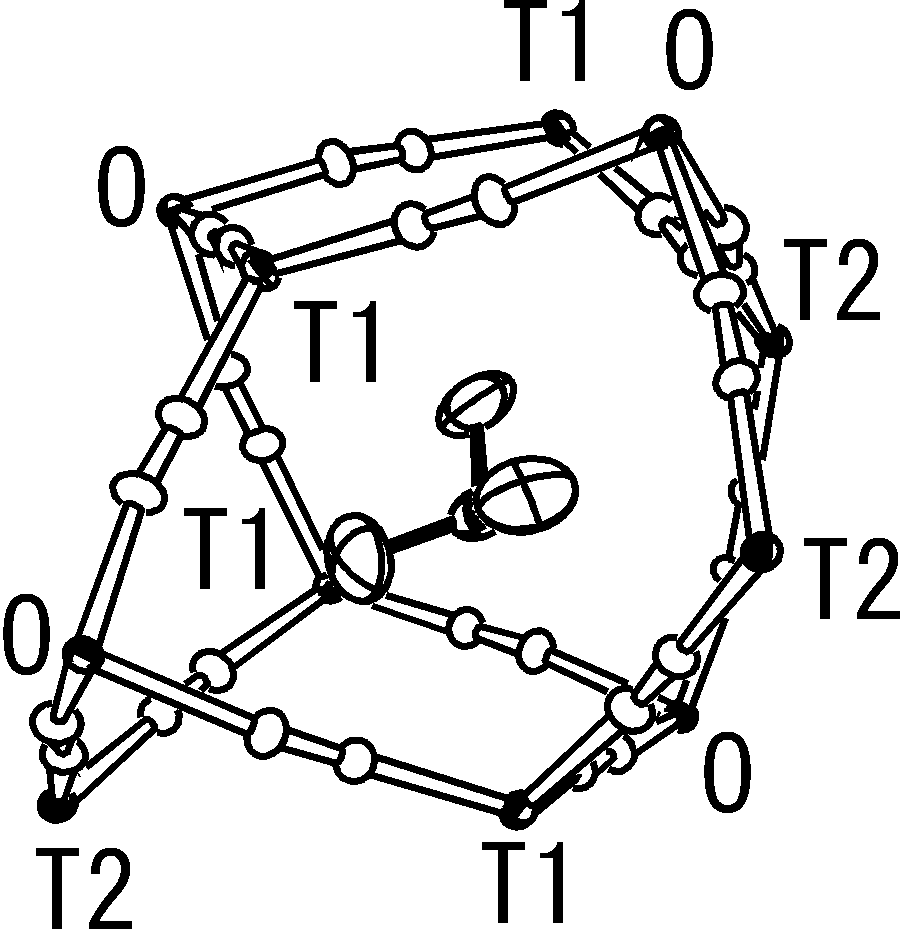

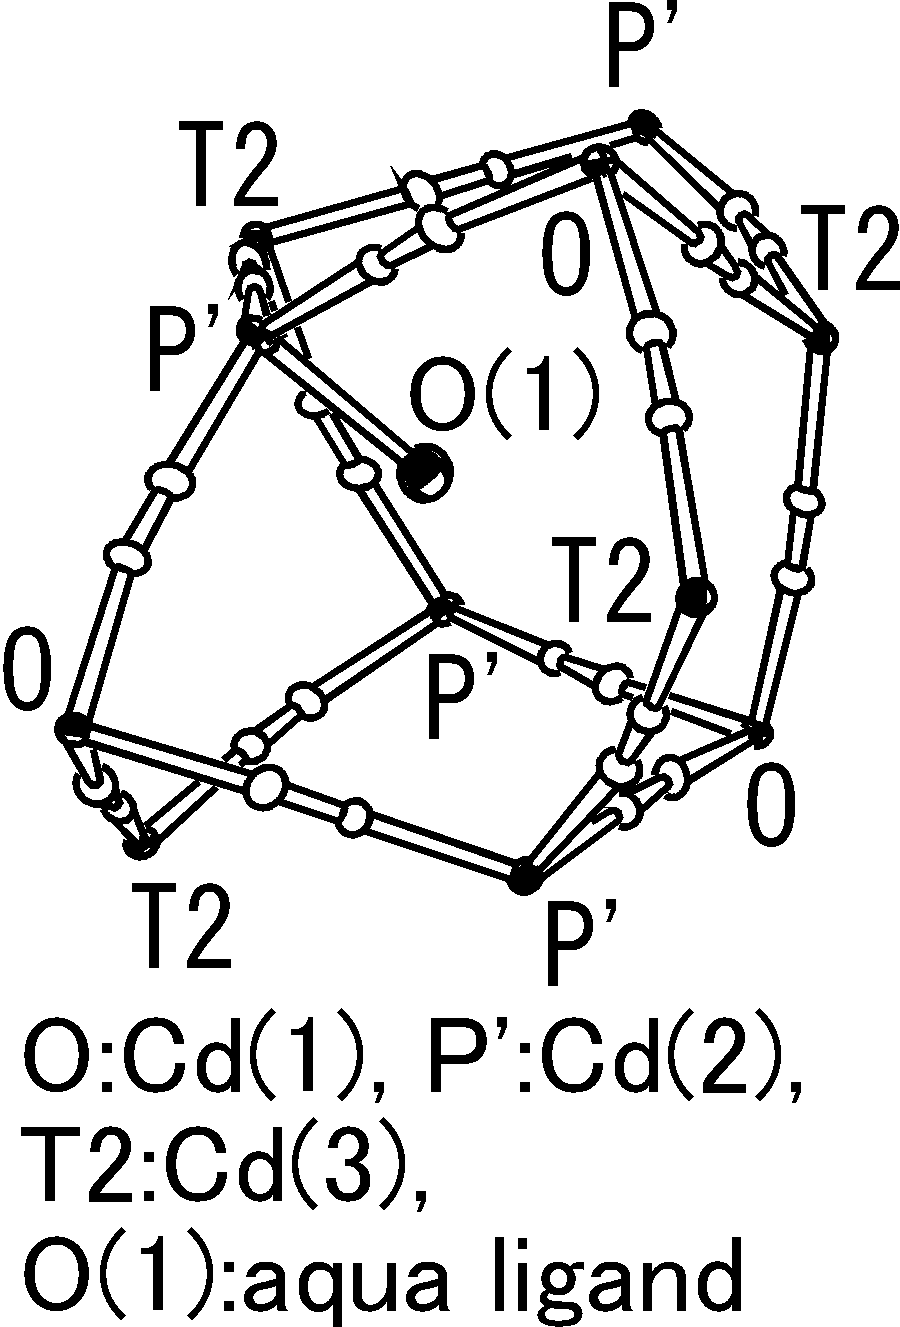


Crystal structure of the chloroform clathrate **IIa-1**.

Crystal structure in the range of *b* = +0.3 to *b* = +0.7 viewed along the *b* axis. The 2-D arrangement of IIA cavities in the monolayer is shown.

IIA cage-like cavity and MV2+.

Crystal structure in the range of *b* = 0 to *b* = +0.5. The 2-D arrangement of IIB cavities in the monolayer is shown.

IIB cage-like cavity and a guest chloroform molecule.

IIB cage-like cavity of the diethyl ether clathrate **IIb-1**. It is similar to the IIB cavity of **IIa-1** except an aqua ligand coordinating to P’.
