# Supplementary material for: Polycyano–polycadmate host clathrates including a methylviologen dication. Syntheses, crystal structures and photo-induced reduction of methylviologen dication
Source: Royal Society of Chemistry journal article supplement (doi:10.1039/b111059d), 2002-01-01
Supplement: b111059d3.doc [file b111059d3.doc]

Supplementary Material (ESI) for Dalton Transactions

This journal is © The Royal Society of Chemistry 2002


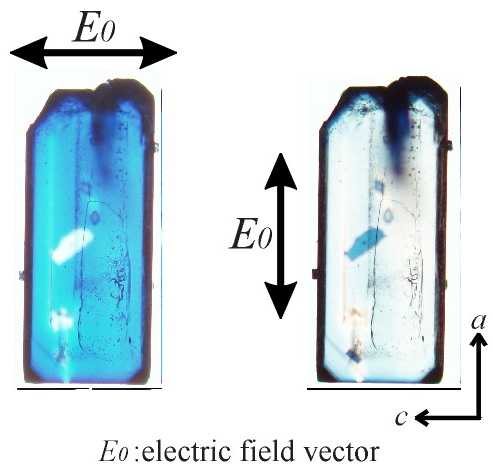

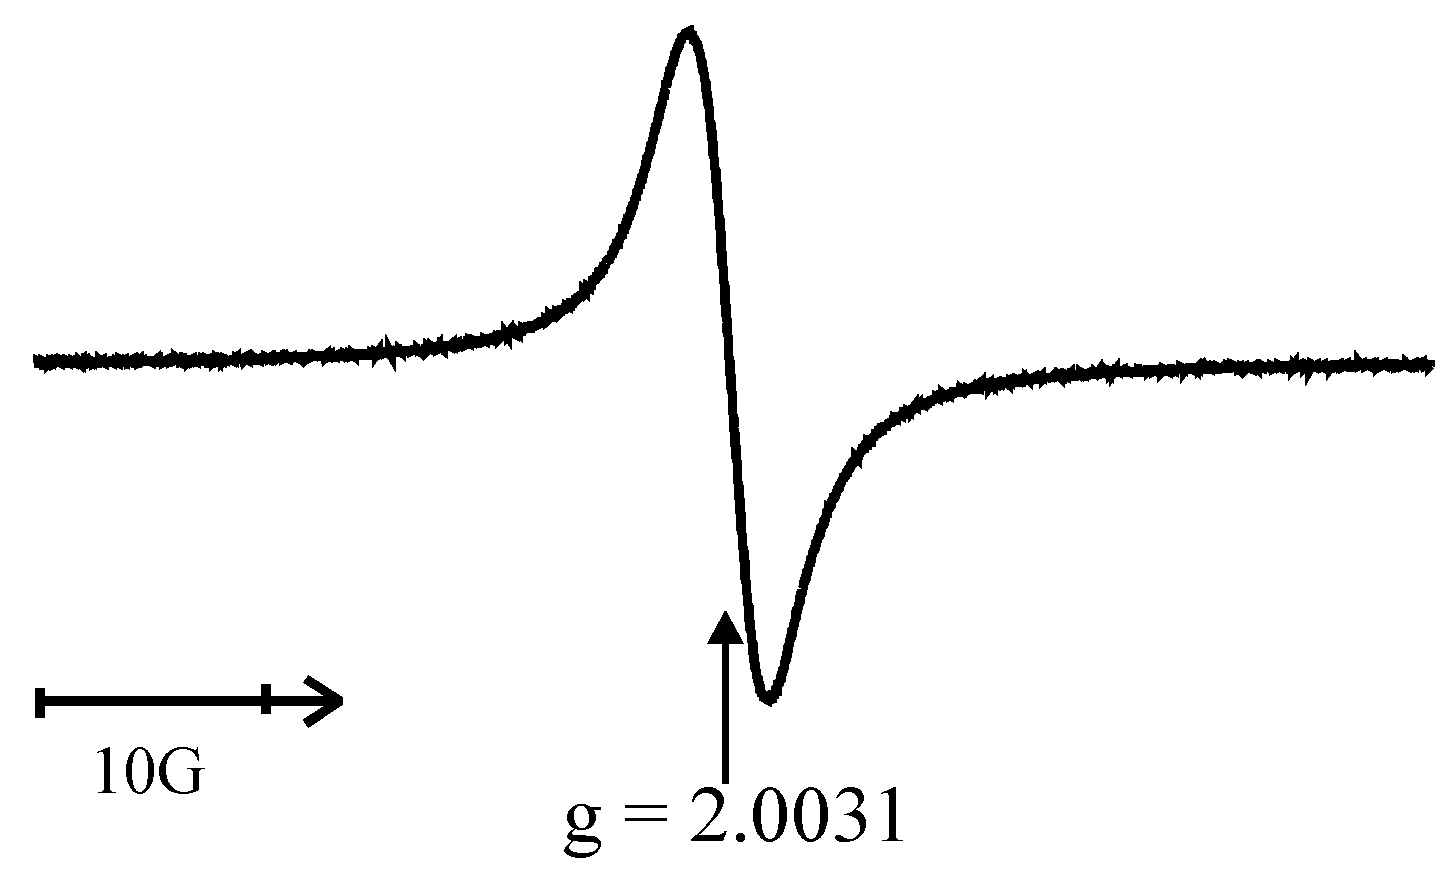


ESR spectrum of the diethyl ether clathrate **IIb-1** powdered sample after UV irradiation measured at room temperature. *g* = 2.0031 and Hp-p = 4.3 G.

Dichroism of the diethyl ether clathrate **IIb-1** single crystal irradiated by UV light. See text and Fig. 9.
